# Supplementary material
Source: ML conference proceedings conference paper supplement (https://proceedings.neurips.cc/paper_files/paper/2022/hash/3dc83fcfa4d13e30070bd4b230c38cfe-Abstract.html)
Supplement: Supplementary file 1 [file 3dc83fcfa4d13e30070bd4b230c38cfe-Supplemental-Conference.zip]

Archive with 25 entries (23 files):
- osrt_supplementary_material/
- __MACOSX/._osrt_supplementary_material
- osrt_supplementary_material/videos.html
- __MACOSX/osrt_supplementary_material/._videos.html
- osrt_supplementary_material/.DS_Store
- __MACOSX/osrt_supplementary_material/._.DS_Store
- osrt_supplementary_material/osrt_appendix.pdf
- __MACOSX/osrt_supplementary_material/._osrt_appendix.pdf
- osrt_supplementary_material/videos/
- osrt_supplementary_material/videos/scene_3_seg.mp4
- __MACOSX/osrt_supplementary_material/videos/._scene_3_seg.mp4
- osrt_supplementary_material/videos/scene_2_seg.mp4
- __MACOSX/osrt_supplementary_material/videos/._scene_2_seg.mp4
- osrt_supplementary_material/videos/scene_4_rgb.mp4
- __MACOSX/osrt_supplementary_material/videos/._scene_4_rgb.mp4
- osrt_supplementary_material/videos/scene_1_seg.mp4
- __MACOSX/osrt_supplementary_material/videos/._scene_1_seg.mp4
- osrt_supplementary_material/videos/scene_2_rgb.mp4
- __MACOSX/osrt_supplementary_material/videos/._scene_2_rgb.mp4
- osrt_supplementary_material/videos/scene_4_seg.mp4
- __MACOSX/osrt_supplementary_material/videos/._scene_4_seg.mp4
- osrt_supplementary_material/videos/scene_3_rgb.mp4
- __MACOSX/osrt_supplementary_material/videos/._scene_3_rgb.mp4
- osrt_supplementary_material/videos/scene_1_rgb.mp4
- __MACOSX/osrt_supplementary_material/videos/._scene_1_rgb.mp4
