# Supplementary material
Source: ML conference proceedings conference paper supplement (https://proceedings.neurips.cc/paper_files/paper/2022/hash/3dc83fcfa4d13e30070bd4b230c38cfe-Abstract.html)
Supplement: Supplementary file 1 [file 3dc83fcfa4d13e30070bd4b230c38cfe-Supplemental-Conference.zip › osrt_supplementary_material/videos.html]

[

Your browser does not support the video tag.
](videos/scene_1_rgb.mp4)
[

Your browser does not support the video tag.
](videos/scene_1_seg.mp4)

[

Your browser does not support the video tag.
](videos/scene_2_rgb.mp4)
[

Your browser does not support the video tag.
](videos/scene_2_seg.mp4)

[

Your browser does not support the video tag.
](videos/scene_3_rgb.mp4)
[

Your browser does not support the video tag.
](videos/scene_3_seg.mp4)

[

Your browser does not support the video tag.
](videos/scene_4_rgb.mp4)
[

Your browser does not support the video tag.
](videos/scene_4_seg.mp4)
